# Supplementary material for: Genomic characterization of small cell carcinomas of the uterine cervix
Source: PubMed Central journal article supplement (PMC8847983; doi:10.1002/1878-0261.12962), 2021-05-13
Supplement: MOL2-16-833-s001.pdf [file MOL2-16-833-s001.pdf]

# **SUPPLEMENTARY MATERIALS**

**Genomic characterization of small cell carcinomas of the uterine cervix**

**Schultheis et al.**

**Supplementary Figures S1 and S2**

**Supplementary Tables S1 - S6**

## Supplementary Figure S1

### SCC1

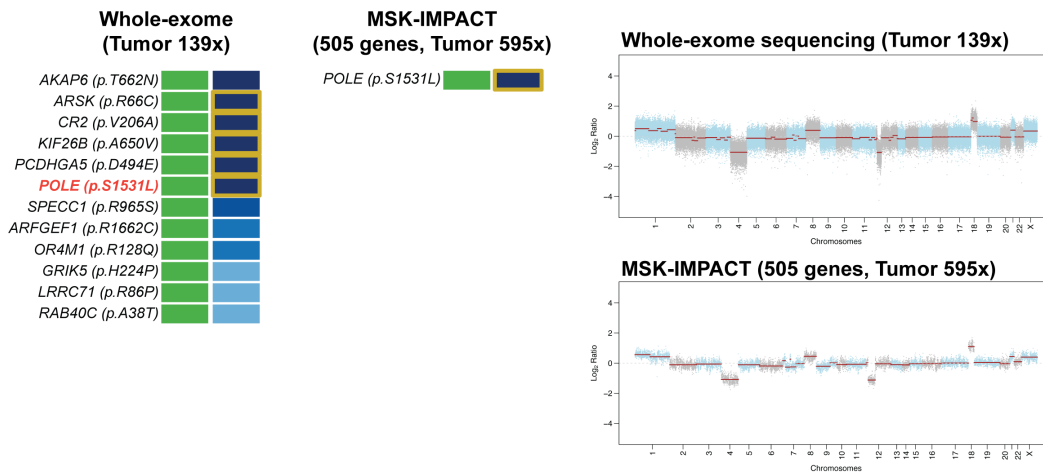

### SCC4

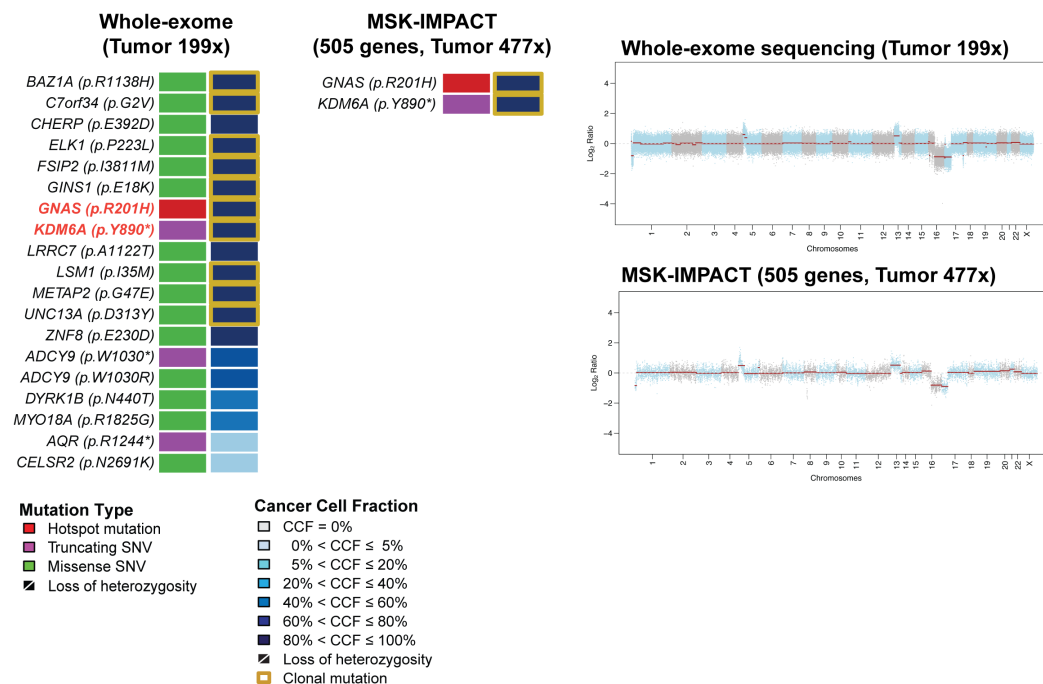

**Supplementary Figure S1: Comparison of whole-exome and high-depth targeted sequencing of uterine cervix small cell carcinomas SCC1 and SCC4.** The same tumor and normal derived DNA samples of SCC1 (top) and SCC4 (bottom) were subjected to whole-exome sequencing and MSK-IMPACT sequencing targeting 505 cancer-related genes. The mutations identified by whole-exome sequencing are shown on the left, and genes being part of the 505 MSK-IMPACT panel are labeled in an orange font. All mutations identified by whole-exome sequencing affecting genes that were part of the 505 targeted panel were identified by MSK-IMPACT sequencing (middle), and no additional mutations were found. The copy number profiles of SCC1 and SCC4 based on whole-exome sequencing and MSK-IMPACT sequencing are also comparable.

## Supplementary Figure S2

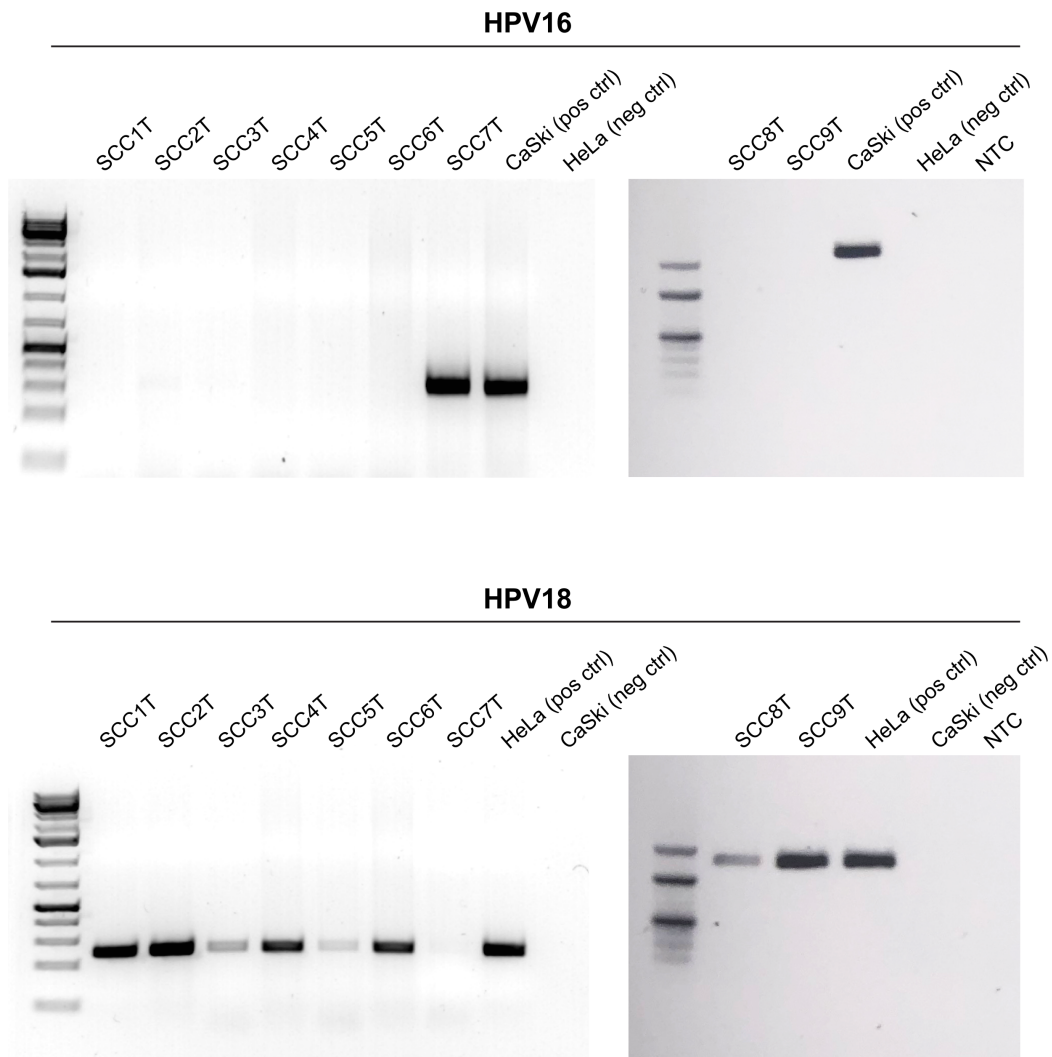

**Supplementary Figure S2. Detection of HPV16 and HPV18 DNA in uterine cervix small cell carcinomas.** DNA from uterine cervix small cell carcinomas was amplified with HPV16-specific primers (top) or with HPV18-specific primers (bottom). Agarose gel electrophoresis is shown. CaSki- and HeLa-derived cell line DNA, which are known to harbor HPV16 and HPV18, respectively, were included as positive controls. Ctrl, control. NTC, no template control.

**Supplementary Table S1.** Antibody clones, dilutions, antigen retrievals and scoring used for the immunohistochemical analyses performed.

| Antibody        | Clone         | Dilution | Antigen retrieval | Detection                                   | Company  | Scoring                                                                        |
|-----------------|---------------|----------|-------------------|---------------------------------------------|----------|--------------------------------------------------------------------------------|
| Ki67            | MIB1          | 1:400    | ER2, 30'          | Leica Bond-RX-BOND Polymer Refine Detection | DAKO     | Nuclear positivity in tumor cells; percentage counting 500 tumor cell nuclei.  |
| p63             | 4A4           | RTU      | CC1, 24'          | Ventana - OptiView                          | Ventana  | No nuclear positivity allowed in the tumor cells.                              |
| Chromogranin A  | LK2H10        | RTU      | CC1, 8'           | Ventana - Optiview                          | Ventana  | Positive cytoplasmic staining in tumor cells at any percentage.                |
| Synaptophysin   | Snp88         | 1:2000   | CC1, 32'          | Ventana - Optiview                          | Biogenex | Positive cytoplasmic staining in tumor cells at any percentage.                |
| p16             | E6H4          | RTU      | CC1, 32'          | Ventana - Optiview                          | Ventana  | Nuclear positivity and cytoplasmic positivity in tumor cells.                  |
| Pan-cytokeratin | Clone AE1/AE3 | 1:600    | ER2, 30'          | Ventana - Optiview                          | DAKO     | Cytoplasmic positivity in tumor cells at any percentage considered as positive |

RTU, ready to use.

**Supplementary Table S2.** Primers for Sanger sequencing validation of mutations identified by whole-exome sequencing.

| Sample | Gene          | AA change | Chromosome | Position  | Forward                        | Reverse                       |
|--------|---------------|-----------|------------|-----------|--------------------------------|-------------------------------|
| SCC1T  | AKAP6         | T662N     | 14         | 3208695   | GAATACCTAGCACTGCCCTCTC         | CCTGCCTAGCCTTGTATGCT          |
| SCC1T  | ARSK          | R66C      | 5          | 94901771  | ATCAATGCTAATTAAATTTCTTTATTTCC  | TGTAGCCACTTCTCCCATTC          |
| SCC1T  | KIF26B        | A650V     | 1          | 245775129 | CCCAGGCATGAGTGACAG             | GAAGAACACGTGTGAGTTGCCG        |
| SCC1T  | POLE          | S1531L    | 12         | 133219542 | AATCGCTGGATGGCTCTG             | CAGTGGGGAGTCTGCCCC            |
| SCC1T  | SPECC1        | R965S     | 17         | 20163560  | AGTATTAGCATCTTCTCCTTACCATGT    | CAGGACTACTGCCCCAGGG           |
| SCC2T  | AGA           | E130Q     | 4          | 178360736 | CTTAGATCTGGTTTTATCCATGATTTT    | TATGGATGTAGGAGCAGTAGGAGA      |
| SCC2T  | ARSF          | C151*     | X          | 3002330   | TCACATGTTTTTGAATGTG            | GAGCCAGAGCTGACTCTCAAA         |
| SCC2T  | BDP1          | Q1353*    | 5          | 70806976  | GGAAAACGAGCTAGAGGAGACC         | TAAGTGTGTTGGACTTAAGGACAAA     |
| SCC2T  | COL5A1        | R498S     | 9          | 137630654 | TTGGACCTTGCCCTCGC              | TGAAGACACAGCCCTCGGG           |
| SCC2T  | GLI3          | R905H     | 7          | 42005957  | GTCTTCAGGCTCATCTCTCC           | GCTCGGCCTACCTGAGCA            |
| SCC2T  | OR2D3         | R138W     | 11         | 6942644   | GAGGAAAACCATTTCTTTTATGG        | ACTAGTCCCCCACTGGCC            |
| SCC2T  | PIK3CA        | E545K     | 3          | 178936091 | AGGGGAAAAATGACAAAGAAAG         | CTGCTTTATTTATCCAATAGGTATGG    |
| SCC2T  | SNRNP200      | R1090W    | 2          | 96953698  | TACATCGCTTTTTCGATCATC          | GAGCTGGAGTAATGAAACCCG         |
| SCC2T  | TP53          | R175H     | 17         | 7578406   | AGACCTAAGAGCAATCAGTGAGGA       | GCCAACTGGCCAAGACCT            |
| SCC2T  | UTP20         | L583S     | 12         | 101696298 | GTGGTTTCTCCTGTTTTTCTGC         | GATTTCAACAATAGAGGCTTTT        |
| SCC2T  | ZNF584        | E378K     | 19         | 58929017  | CTGAAAGTCCACACTGGG             | TCCTGAGCCTTCTGGA              |
| SCC4T  | CHERP         | E392D     | 19         | 16639020  | GTGGGATCTGGTGTGTG              | TAAGTGCCTGCTACTGGATTAG        |
| SCC4T  | MYO18A        | R1825G    | 15         | 72208836  | GACTTGGTAATGCGATCTTGTAGT       | GAAAACCTGGCTGAGAATTTTGG       |
| SCC4T  | LRRC7         | A1122T    | 1          | 70504985  | TTCTCAGCATCTGTGAATGAG          | CGATCCAGCCCTCCCCTATA          |
| SCC4T  | GINS1         | E18K      | 20         | 25388508  | CGCCATGTTCTCGCAA               | TGCCCTCCCAAGTCTAC             |
| SCC4T  | BAZ1A         | R1138H    | 14         | 35234363  | GACATATCTTGCAACGCGC            | TTCTTCTGCTAGTCTATCCAAGTTT     |
| SCC4T  | METAP2        | G47E      | 12         | 95868095  | GAAGAAGGAGCTGCCTCTACG          | TGAGCCAAACAGTTCAGCC           |
| SCC4T  | KDM6A         | Y890*     | X          | 44929570  | AAACAGATCTGCTTCTGTTAAACC       | TCAAACATTTTCACTTGTATGAACTT    |
| SCC4T  | ELK1          | P223L     | X          | 47497568  | CTCTTCTTGGGCCCTTCTA            | CCCGGGGAAATCACTG              |
| SCC4T  | ADCY9         | W1030*    | 16         | 4016748   | GGTCTTGGAGTAGGCTCGGG           | ACTACCACGGAGACGTGGAA          |
| SCC4T  | ADCY9         | W1030R    | 16         | 4016748   | GGTCTTGGAGTAGGCTCGGG           | ACTACCACGGAGACGTGGAA          |
| SCC4T  | GNAS          | R201H     | 20         | 57484421  | TATTACTGTTTCGGTGGCTTTG         | ACAGTTGGCTTACTGGAAGTTGA       |
| SCC4T  | UNC13A        | D313Y     | 19         | 17767038  | TCTCTCTCCAGGAAGTC              | CTCCGACATGGAGGATGAG           |
| SCC5T  | ANKRD44       | P945S     | 2          | 197858397 | CTGCAGTCCCTGTGACTTT            | ATCCATGACTATTTGTAGAGTCAAGTAC  |
| SCC5T  | ROBO2         | W451C     | 3          | 77607216  | TTTGACAGATAGACCTCCACTATAA      | AGATGATAACTCATGTACAAGTCCAAT   |
| SCC5T  | RQCD1         | R259H     | 2          | 219457379 | AGAATTTGTTTGTGTTTTGTGTGTTT     | GTTCCAGCAGAGTATTTCCCTAAAGTC   |
| SCC5T  | FAM120A       | T996S     | 9          | 96324527  | TTTATTCATTAGGCGTCCAA           | TGCCTGGTTTTGTAACTCT           |
| SCC5T  | FLNC          | R1008H    | 7          | 128484151 | GTGAACACACGAGGGGCT             | TAGCGCACAGCCTGGG              |
| SCC5T  | PCDH17        | L48F      | 13         | 58206822  | TGCCCTCACTCTCAAGAACC           | CTGTCTGGTCCACGTCC             |
| SCC5T  | ONECUT1       | P249L     | 15         | 53081336  | ATTGCTGACCTGCGCG               | AACGGCTTCCGAAGCCC             |
| SCC5T  | CHAT          | Q311P     | 10         | 50833698  | GACACGCTGGTGCTCAG              | GTAATGACGTGGAACGCATG          |
| SCC5T  | FZR1          | M27V      | 19         | 3525875   | CTGGGGGACACTCTCGG              | GGGATGAAGCGGTCTCC             |
| SCC5T  | SCIN          | V122M     | 7          | 12620694  | GGCAGACACCTCATCAGTTTT          | CGACCCITCACATGTAGGAG          |
| SCC5T  | ITSN1         | P113S     | 21         | 35107500  | CATAGCTATGAACTTATCAAAGTCAA     | ATAATGTTATAAACCGAGAGGGAAAA    |
| SCC5T  | PLA2G4F       | F318I     | 15         | 42442018  | TGCTGCAGGGCCTTG                | CACCCAGAACCCCCCA              |
| SCC5T  | CACNA1F       | G985E     | X          | 49074921  | TGATCTGCGCCCGAGG               | ATCTCGGTGGTGAAGATTCTG         |
| SCC6T  | IDH1          | H309Y     | 2          | 209104653 | GGGCTGCTTTGGAGAGCA             | CTCTTCATGCAGTTGGACCC          |
| SCC6T  | LAMB4         | R1252T    | 7          | 107696077 | ATCAGTCCCTAAAGTCAACATAGG       | TCTGTGAGGCAGACTTCAAAGA        |
| SCC6T  | METTL18       | M1I       | 1          | 169762834 | AGAACATTTTCTGCTCCTCTCTCT       | CCATGTAAGCTGTAAAGGAGAATT      |
| SCC6T  | NIPBL         | S2013I    | 5          | 37038770  | GTTTCCACTAGCTTGTATATTTTAGTG    | CTAAATTTAAAGCACTTAATGTTTTATGT |
| SCC6T  | NOTCH2        | E1025K    | 1          | 120483288 | AGTCAATTACCTGACAGTTTTTCCC      | TAGCTGATGTTGCTGTGTTTGC        |
| SCC6T  | NPY5R         | F78L      | 4          | 164271657 | GATGACTTACAGTATTTTCTGATTGGG    | CATAATATGGCAGTACTTTGTC        |
| SCC6T  | ZCCHC11       | D237N     | 1          | 52991244  | GTAATTTAAATGGTTAAACCGGGG       | TGCAAACTCACCCAGTACT           |
| SCC6T  | ZCCHC8        | Q205*     | 12         | 122967884 | AAGCCAAAAGTTTATGATTTTGGT       | CTTTCCGAAGGATGGGAAA           |
| SCC6T  | RP11-1220K2.2 | R356C     | 7          | 141838447 | TCTTGGGTTCCAGCTTAGTCTG         | TAAAATGGGAATTTGGTGTCAAC       |
| SCC7T  | C19orf57      | E245*     | 19         | 14000936  | CAGGGGACACCGTCTCC              | CCTGTGACAGCAAGGGGC            |
| SCC7T  | CEP97         | Q566E     | 3          | 101477146 | AAAGAAACCATATCTCAAGCAACTTC     | TCCTTATTTTATCAGTTAAGCAGACA    |
| SCC7T  | CEP97         | S330*     | 3          | 101476002 | TAGACCAGGTATTATGATTTTTAGGT     | ATATGCACCTTTTTCTGCTTATGA      |
| SCC7T  | CEP97         | Q580*     | 3          | 101477188 | ATTTTAAACCCAGAGATCTGTTGCT      | CAACCAACAAAACAGTGCATC         |
| SCC7T  | FGFR3         | E140K     | 4          | 1801512   | GGACCTGCCCCATCT                | CCTTAGTCCCTCAGCTGCC           |
| SCC7T  | GBE1          | H291Q     | 3          | 81692051  | TGCTATCCCAAGATCATGAGTC         | TCATTGTTAGCCGTTATGGAAC        |
| SCC7T  | IL24          | E105K     | 1          | 207074845 | GAAGATCCCTATCTCTGCTGTG         | CCAGAGTAGAGATGACTTCCAGAGTC    |
| SCC7T  | KANK4         | P795T     | 1          | 62728920  | AGTGGGACACGCTGTAGTGA           | GGAGGAACTCTTGCTGGC            |
| SCC7T  | NLRP14        | C505*     | 11         | 7064772   | ATGAAAACCTGCTATGTTTCAACC       | CTTCATTTCAAAGGCCAAACA         |
| SCC7T  | P2RX7         | E175Q     | 12         | 121600313 | TTTGACCCCTATAGGAATTCAGAC       | CTGAGAGGGGAAGGCC              |
| SCC7T  | RNF168        | Q105*     | 3          | 196215543 | ACTAAATTTAAATCTGAAACTAAAAACACA | CAAAAGGAGATATTGCTGCAGTT       |
| SCC7T  | SLC12A7       | E989Q     | 5          | 1057647   | AGGATCTGTTCCCCCGAG             | CAGGAACACCCGCTCC              |
| SCC7T  | TMEM51        | L213F     | 1          | 15546114  | TCACTGACGGGGCTCG               | CGTGGCTCAAGTGGGG              |
| SCC7T  | INPP5D        | L46Q      | 2          | 234104059 | CTGCAAATGGAACCCCTT             | ACCCACGCCCACCTTAC             |
| SCC7T  | CACNA1A       | R1977H    | 19         | 13325057  | GTGGTGACATGCAAGCCA             | AAGATCTACGAGCCATGATG          |

**Supplementary Table S3.** Sequencing statistics, number of somatic mutations and validation rates.

| Case | Tissue Type | Sequencing Type | Mean Target Coverage (X) | Target Bases 2X | Target Bases 50X | Target Bases 100X | Total # Somatic Mutations | # Somatic Non-synonymous Mutations | Validation Rate Sanger Sequencing | Validation Rate MSK-IMPACT |
|------|-------------|-----------------|--------------------------|-----------------|------------------|-------------------|---------------------------|------------------------------------|-----------------------------------|----------------------------|
| SCC1 | Normal      | Whole-exome     | 88                       | 100%            | 77%              | 34%               | 21                        | 12                                 | 100% (5/5)                        | 100% (1/1)                 |
|      | Tumor       |                 | 139                      | 100%            | 92%              | 68%               |                           |                                    |                                   |                            |
| SCC2 | Normal      | Whole-exome     | 121                      | 100%            | 98%              | 93%               | 34                        | 24                                 | 100% (11/11)                      | Not performed              |
|      | Tumor       |                 | 336                      | 100%            | 90%              | 59%               |                           |                                    |                                   |                            |
| SCC3 | Normal      | MSK-IMPACT 505  | 122                      | 95%             | 78%              | 56%               | 10                        | 6                                  | Not performed                     | Not performed              |
|      | Tumor       |                 | 408                      | 100%            | 99%              | 99%               |                           |                                    |                                   |                            |
| SCC4 | Normal      | Whole-exome     | 152                      | 100%            | 96%              | 84%               | 32                        | 19 (18 validated)                  | 92% (11/12)                       | 100% (2/2)                 |
|      | Tumor       |                 | 199                      | 100%            | 95%              | 75%               |                           |                                    |                                   |                            |
| SCC5 | Normal      | Whole-exome     | 140                      | 100%            | 97%              | 88%               | 41                        | 26                                 | 100% (13/13)                      | Not performed              |
|      | Tumor       |                 | 221                      | 100%            | 93%              | 69%               |                           |                                    |                                   |                            |
| SCC6 | Normal      | Whole-exome     | 181                      | 100%            | 93%              | 73%               | 42                        | 26                                 | 100% (9/9)                        | Not performed              |
|      | Tumor       |                 | 182                      | 100%            | 96%              | 80%               |                           |                                    |                                   |                            |
| SCC7 | Normal      | Whole-exome     | 175                      | 100%            | 91%              | 70%               | 84                        | 59 (57 validated)                  | 87% (13/15)                       | Not performed              |
|      | Tumor       |                 | 183                      | 100%            | 94%              | 75%               |                           |                                    |                                   |                            |
| SCC8 | Normal Pool | MSK-IMPACT 505  | 115                      | 100%            | 79%              | 55%               | 0                         | 0                                  | Not applicable                    | Not performed              |
|      | Tumor       |                 | 278                      | 99%             | 99%              | 97%               |                           |                                    |                                   |                            |
| SCC9 | Normal      | MSK-IMPACT 505  | 202                      | 100%            | 99%              | 93%               | 10                        | 8                                  | Not performed                     | Not performed              |
|      | Tumor       |                 | 405                      | 100%            | 99%              | 99%               |                           |                                    |                                   |                            |



**Supplementary Table S5.** Putative in-frame fusion transcripts with driver probability >0.1 identified in SCC1 and SCC2 using RNA-sequencing.

| Sample ID | Genes          | Genomic coordinates           | Spanning and split reads (n) | Split reads (n) | Driver probability (Oncofuse) | Algorithm   | 5' location | 3' location | P-value    |
|-----------|----------------|-------------------------------|------------------------------|-----------------|-------------------------------|-------------|-------------|-------------|------------|
| SCC2T     | VMP1-RPS6KB1   | chr17:57842500>chr17:57987922 | 3                            | 3               | 0.997438                      | chimerascan | Intron      | Intron      | 0.04913752 |
| SCC2T     | SLC35G2-NCK1   | chr3:136538057>chr3:136646825 | 2                            | 1               | 0.9961532                     | chimerascan | Exon        | Intron      | 0.05754801 |
| SCC1T     | DMC1-DDX17     | chr22:38917612>chr22:38897286 | 3                            | 2               | 0.9858879                     | chimerascan | Intron      | Intron      | 0.14232601 |
| SCC1T     | ABCA10-ABCA6   | chr17:67145173>chr17:67136890 | 2                            | 2               | 0.9736921                     | chimerascan | Intron      | Intron      | 0.19960184 |
| SCC1T     | ARFIP2-TRIM3   | chr11:6498947>chr11:6486963   | 2                            | 2               | 0.9446882                     | chimerascan | Intron      | Intron      | 0.34136487 |
| SCC2T     | PDLIM2-C8orf58 | chr8:22447255>chr8:22458394   | 2                            | 2               | 0.8289519                     | chimerascan | Intron      | Intron      | 0.63653723 |
| SCC2T     | GKAP1-KIF27    | chr9:86431910>chr9:86530594   | 7                            | 2               | 0.5981402                     | chimerascan | Intron      | Intron      | 1          |
| SCC2T     | GKAP1-KIF27    | chr9:86431910>chr9:86530594   | 28                           | 17              | 0.5981402                     | defuse      | Intron      | Intron      | 1          |
| SCC1T     | POLA2-CDC42EP2 | chr11:65063462>chr11:65088014 | 4                            | 3               | 0.5912114                     | chimerascan | Intron      | Intron      | 1          |
| SCC2T     | POLA2-CDC42EP2 | chr11:65063462>chr11:65088014 | 23                           | 10              | 0.5912114                     | chimerascan | Intron      | Intron      | 1          |
| SCC2T     | POLA2-CDC42EP2 | chr11:65063462>chr11:65088014 | 41                           | 21              | 0.5912114                     | defuse      | Intron      | Intron      | 0.97330609 |
| SCC2T     | PIBF1-KLF5     | chr13:73573134>chr13:73635998 | 2                            | 2               | 0.5481406                     | chimerascan | Intron      | Intron      | 1          |
| SCC1T     | TLK2-FAM157A   | chr17:60637488>chr3:197907625 | 33                           | 33              | 0.2722771                     | chimerascan | Intron      | Intron      | 1          |
| SCC2T     | TLK2-FAM157A   | chr17:60637488>chr3:197907625 | 44                           | 29              | 0.2722771                     | chimerascan | Intron      | Intron      | 1          |
| SCC1T     | TLK2-FAM157B   | chr17:60637488>chr9:141134069 | 33                           | 33              | 0.2722771                     | chimerascan | Intron      | Intron      | 1          |
| SCC2T     | HOXB6-HOXB3    | chr17:46681841>chr17:46651377 | 3                            | 2               | 0.1747878                     | chimerascan | Intron      | Exon        | 1          |
| SCC1T     | ZNF716-ZNF678  | chr7:57522293>chr1:227842036  | 4                            | 4               | 0.1540229                     | chimerascan | Intron      | Intron      | 1          |
| SCC1T     | F8-TMLHE       | chrX:154114408>chrX:154718952 | 2                            | 1               | 0.1096824                     | chimerascan | Intron      | Exon        | 1          |
| SCC1T     | MBD1-CCDC11    | chr18:47799193>chr18:47788590 | 3                            | 2               | 0.1056514                     | chimerascan | Intron      | Intron      | 1          |



**Supplementary Table S6.** Putative HPV integration sites based on RNA-sequencing.

| <b>Sample ID</b> | <b>hg19 locus</b> | <b>hg19 annotation</b>    | <b>Mate 1 HPV18 Position</b> | <b>Mate 2 hg19 Chromosome 18 Position</b> |
|------------------|-------------------|---------------------------|------------------------------|-------------------------------------------|
| SCC1T            | 18q12.3           | -                         | 882                          | 39411292                                  |
| SCC1T            | 18q12.3           | -                         | 2280                         | 39497187                                  |
| SCC1T            | 18q12.3           | -                         | 3669                         | 39401088                                  |
| SCC2T            | 8p22              | RP11-89M16.1-002 (lncRNA) | 2603                         | 129517175                                 |
| SCC2T            | 8p22              | RP11-89M16.1-002 (lncRNA) | 4908                         | 129518183                                 |
| SCC2T            | 8p22              | RP11-89M16.1-002 (lncRNA) | 5996                         | 129517009                                 |
| SCC2T            | 8p22              | RP11-89M16.1-002 (lncRNA) | 5998                         | 129509523                                 |
